# Supplementary material for: Intrahepatic macrophage populations in the pathophysiology of primary sclerosing cholangitis
Source: PubMed Central journal article supplement — JHEP Rep. 2019 Oct 31;1(5):369–76. doi: 10.1016/j.jhepr.2019.10.003 (PMC7005651; doi:10.1016/j.jhepr.2019.10.003), 2019-10-31
Supplement: mmc1.pdf [file mmc1.pdf]

# **Intrahepatic macrophage populations in the pathophysiology of primary sclerosing cholangitis**

Yung-Yi Chen, Kathryn Arndtz, Gwilym Webb, Margaret Corrigan, Sarah Akiror,  
Evaggelia Liaskou, Paul Woodward, David H. Adams, Chris J. Weston, Gideon M.  
Hirschfield

Table of contents

Fig. S1.....2

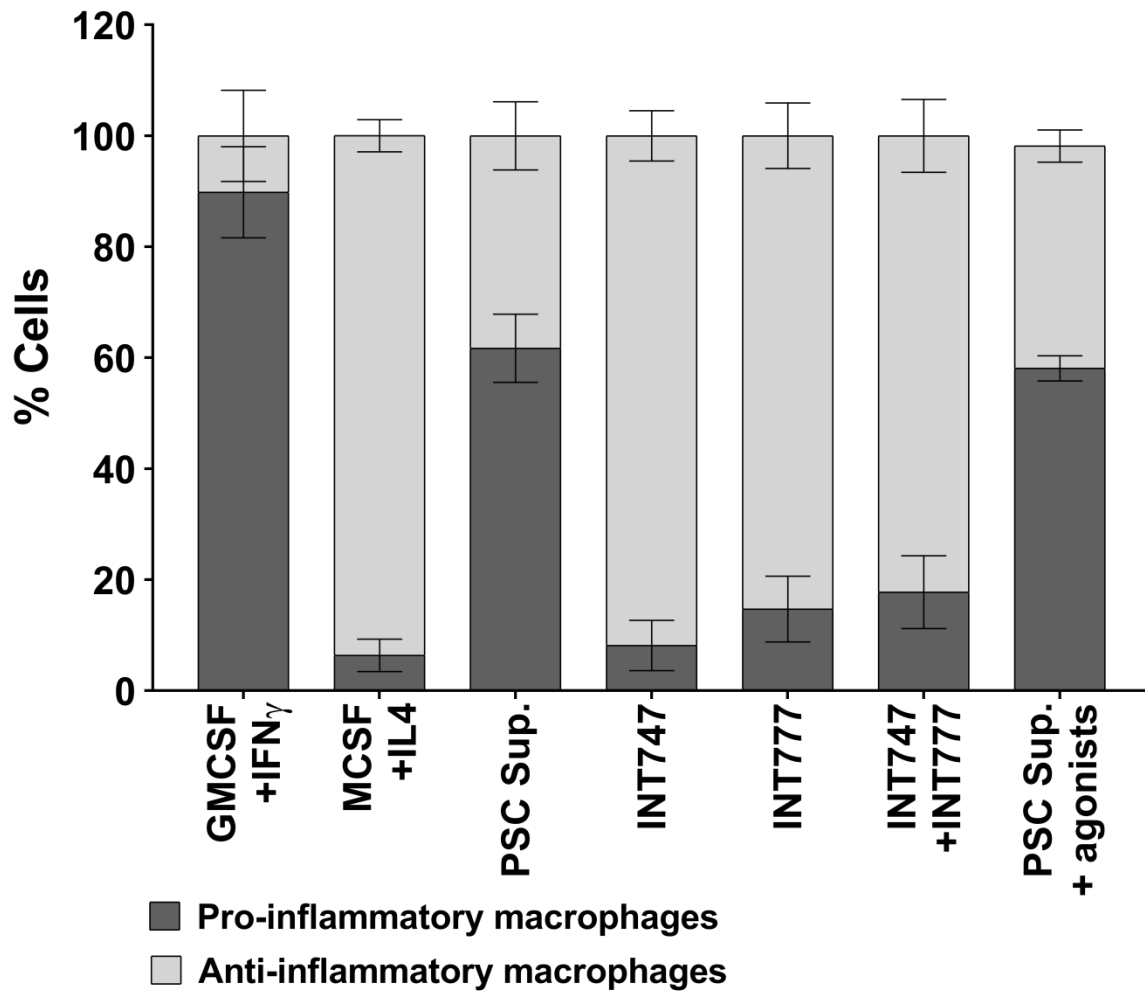

**Fig. S1. TGR-5 activation with INT777 does not lead to an increase in the anti-inflammatory macrophage population.** Isolated monocytes were incubated with either pro-inflammatory conditioned media, containing GM-CSF (50ng/ml) and IFN- $\gamma$  (50ng/ml); anti-inflammatory conditioned media containing M-CSF (50ng/ml) and IL-4 (20ng/ml); bile acids including FXR agonist INT747(30 $\mu$ M); or TGR-5 agonist INT777 (30 $\mu$ M) without (a) or with (b) PSC conditioned media. Macrophage subsets were studied 6 days after co-culturing. Data are represented as Mean $\pm$ SEM, n=3. No significant differences were observed for macrophage populations in the presence of PSC supernatant with and without agonists.
