# Supplementary material for: Intrahepatic macrophage populations in the pathophysiology of primary sclerosing cholangitis
Source: PubMed Central journal article supplement — JHEP Rep. 2019 Oct 31;1(5):369–76. doi: 10.1016/j.jhepr.2019.10.003 (PMC7005651; doi:10.1016/j.jhepr.2019.10.003), 2019-10-31
Supplement: mmc2.pdf [file mmc2.pdf]

## JHEP Reports

### CTAT methods

Tables for a “Complete, Transparent, Accurate and Timely account” (CTAT) are now mandatory for all revised submissions. The aim is to enhance the reproducibility of methods.

- Only include the parts relevant to your study
- Refer to the CTAT in the main text as ‘Supplementary CTAT Table’
- Do not add subheadings
- Add as many rows as needed to include all information
- Only include one item per row

If the CTAT form is not relevant to your study, please outline the reasons why:

|  |
|--|
|  |
|--|

#### 1.1 Antibodies

| Name                  | Citation | Supplier                   | Cat no.     | Clone no.         |
|-----------------------|----------|----------------------------|-------------|-------------------|
| CD14-APC-eFluor780    |          | Thermo Fisher Scientific   | 47-0149-42  | 61D3              |
| CD16-PeCF594          |          | BD Biosciences             | 562293      | 3G8               |
| HLA-DR eFluor450      |          | Thermo Fisher Scientific   | 48-9952-42  | L243              |
| CD66b-FITC            |          | BD Biosciences             | 555724      | G10F5             |
| CD3-PE                |          | Thermo Fisher Scientific   | 12-0037-42  | OKT3              |
| CD19-PE               |          | Thermo Fisher Scientific   | 12-0199-42  | HIB19             |
| CD56-PE               |          | Thermo Fisher Scientific   | 12-0567-42  | CMSSB             |
| CD68-PE-Cy7           |          | Thermo Fisher Scientific   | 25-0689-42  | Y1/82A            |
| CD163-APC             |          | Thermo Fisher Scientific   | 17-1639-42  | GHI/61            |
| CD206-PerCP-eFluor710 |          | Thermo Fisher Scientific   | 46-2069-42  | 19.2              |
| TGR-5-PE              |          | R&D systems                | FAB4286P    | 409522            |
| TGR-5, purified       |          | LifeSpan Biosciences, Inc. | LS-A1936-50 | Rabbit polyclonal |

#### 1.2 Cell lines

| Name | Citation | Supplier | Cat no. | Passage no. | Authentication test method |
|------|----------|----------|---------|-------------|----------------------------|
| N/A  |          |          |         |             |                            |

#### 1.3 Organisms

| Name | Citation | Supplier | Strain | Sex | Age | Overall n number |
|------|----------|----------|--------|-----|-----|------------------|
| N/A  |          |          |        |     |     |                  |

## 1.4 Sequence based reagents

| Name | Sequence | Supplier |
|------|----------|----------|
| N/A  |          |          |

## 1.5 Biological samples

| Description | Source | Identifier  |
|-------------|--------|-------------|
| Blood       | QEHB   | 2003/242    |
| Liver       | QEHB   | 06/Q2702/61 |

See Text for human sample details.

## 1.6 Deposited data

| Name of repository | Identifier | Link |
|--------------------|------------|------|
| N/A                |            |      |

## 1.7 Software

| Software name    | Manufacturer            | Version |
|------------------|-------------------------|---------|
| GraphPad Prism 8 | GraphPad Software, Inc. | 8.0.0   |
| Image J          | NIH                     | 1.48    |
| FlowJo           | FlowJo LLC              | 10.0.8  |

## 1.8 Other (e.g. drugs, proteins, vectors etc.)

|                                 |                      |               |
|---------------------------------|----------------------|---------------|
| INT-747                         | Abcam                | ab144246      |
| INT-777                         | Cambridge Bioscience | CAY17678-1mg  |
| Recombinant human IL-4          | PeptoTech            | 200-04B-20µg  |
| Recombinant human IFN- $\gamma$ | PeptoTech            | 300-02B-100µg |
| Recombinant human MCSF          | PeptoTech            | 300-25B-10µg  |
| Recombinant human GMCSF         | PeptoTech            | 300-03B-20µg  |

## 1.9 Please provide the details of the corresponding methods author for the manuscript:

|     |
|-----|
| N/A |
|-----|

## 2.0 Please confirm for randomised controlled trials all versions of the clinical protocol are included in the submission. These will be published online as supplementary information.

|     |
|-----|
| N/A |
|-----|
